# Supplementary material for: The flora phenotype ontology (FLOPO): tool for integrating morphological traits and phenotypes of vascular plants
Source: J Biomed Semantics. 2016 Nov 14;7:65. doi: 10.1186/s13326-016-0107-8 (PMC5109718; doi:10.1186/s13326-016-0107-8)
Supplement: Additional file 1 — Annotation of Floras 1. The file contains the manual annotation of Salacia erecta, Cucumeropsis mannii, Oxalis, and Basella alba. The file includes identified phenotypes and the mapping to FLOPO. It also highlights missing classes in PATO or PO. (XLSX 24 kb) [file 13326_2016_107_MOESM1_ESM.xlsx]

## Sheet: characters
taxonNo	family	taxon	mainsubject	subject	subpart	category	value	mod	posit	phase	presence	start	end
	Hippocrateaceae	Salacia erecta	Graines					nombreuses						http://purl.obolibrary.org/obo/PO_0009010	I can't find a quality of numerous
	Hippocrateaceae	Salacia erecta	fruit											http://purl.obolibrary.org/obo/PO_0009001
	Hippocrateaceae	Salacia erecta	fruit				ovoïdes							http://purl.obolibrary.org/obo/PO_0009001 and http://purl.obolibrary.org/obo/PATO_0005014
	Hippocrateaceae	Salacia erecta	fruit				subglobuleux							http://purl.obolibrary.org/obo/PO_0009001 and http://purl.obolibrary.org/obo/PATO_0005014
	Hippocrateaceae	Salacia erecta	fruit				diam							http://purl.obolibrary.org/obo/PATO_0001334
	Hippocrateaceae	Salacia erecta	fruit				mamelonnés au sommet							missing	papilous
	Hippocrateaceae	Salacia erecta	fruit				munis de 3 crêtes							'fruit ridged'
	Hippocrateaceae	Salacia erecta	fruit	exocarpe										http://purl.obolibrary.org/obo/PO_0009085
	Hippocrateaceae	Salacia erecta	fruit	exocarpe			épais							'exocarp increased thickness'
	Hippocrateaceae	Salacia erecta	fruit	exocarpe			lisse	±						'exocarp smooth'
	Hippocrateaceae	Salacia erecta	fruit	pédoncule				atteignant 1 cm de long						http://purl.obolibrary.org/obo/PO_0009053
	Hippocrateaceae	Salacia erecta	flower											http://purl.obolibrary.org/obo/PO_0009046
	Hippocrateaceae	Salacia erecta	flower	pétales										http://purl.obolibrary.org/obo/PO_0009032
	Hippocrateaceae	Salacia erecta	flower	pétales			oblongs-elliptiques							missing
	Hippocrateaceae	Salacia erecta	flower	pétales			de 3–4 mm de long							'petal length'
	Hippocrateaceae	Salacia erecta	flower	pétales			1–3 mm de large							missing	petal width
	Hippocrateaceae	Salacia erecta	flower	pulvinus										http://purl.obolibrary.org/obo/PO_0009000
	Hippocrateaceae	Salacia erecta	flower	pulvinus			patelliforme							missing	pulvinus plate-shaped
	Hippocrateaceae	Salacia erecta	flower	disque			sphérique							'disk flower spherical'
	Hippocrateaceae	Salacia erecta	flower	étamines				3						http://purl.obolibrary.org/obo/PO_0009029
	Hippocrateaceae	Salacia erecta	flower	filet										http://purl.obolibrary.org/obo/PO_0009067
	Hippocrateaceae	Salacia erecta	flower	filet			linéaire							'filament linear'
	Hippocrateaceae	Salacia erecta	flower	filet			de 1–2 mm de long							'filament length'
	Hippocrateaceae	Salacia erecta	flower	anthères										http://purl.obolibrary.org/obo/PO_0009066
	Hippocrateaceae	Salacia erecta	flower	anthères			déhiscentes par 2 fentes longitudinales-obliques ± confluentes au sommet							missing
	Hippocrateaceae	Salacia erecta	flower	ovaire										http://purl.obolibrary.org/obo/PO_0009072
	Hippocrateaceae	Salacia erecta	flower	ovaire			enfoncé dans le disque							missing	ovary embedded in the disc
	Hippocrateaceae	Salacia erecta	flower	ovaire			3-loculaire							http://purl.obolibrary.org/obo/PO_0025266
	Hippocrateaceae	Salacia erecta	flower	style										http://purl.obolibrary.org/obo/PO_0009074
	Hippocrateaceae	Salacia erecta	flower	style			atteignant 1,5 mm de long							'style length'
	Hippocrateaceae	Salacia erecta	flower	ovules										http://purl.obolibrary.org/obo/PO_0020003
	Hippocrateaceae	Salacia erecta	flower	ovules			4–6 par loge							missing
	Hippocrateaceae	Salacia erecta	flower	flower			jaune verdâtre							http://purl.obolibrary.org/obo/PATO_0001941	'yellow green' rather than greenish yellow, which is missing from PATO
	Hippocrateaceae	Salacia erecta	flower	flower			étalées de 4–8 mm de diam							'flower diameter'
	Hippocrateaceae	Salacia erecta	flower	pédicelle										http://purl.obolibrary.org/obo/PO_0009052
	Hippocrateaceae	Salacia erecta	flower	pédicelle			de 3–9 mm de long							'pedicel length'
	Hippocrateaceae	Salacia erecta	flower	pédicelle			lisse							'pedicel smooth'
	Hippocrateaceae	Salacia erecta	flower	boutons										http://purl.obolibrary.org/obo/PO_0000055
	Hippocrateaceae	Salacia erecta	flower	boutons			ovoïdes							'bud ovate'
	Hippocrateaceae	Salacia erecta	flower	boutons			oblongs							'bud oblong'
	Hippocrateaceae	Salacia erecta	flower	boutons			de 2–3,5 mm de long							'bud length'
	Hippocrateaceae	Salacia erecta	flower	boutons			1,3–3 mm de diam							'bud width'
	Hippocrateaceae	Salacia erecta	flower	sépales			inégaux							missing	sepals unequal
	Hippocrateaceae	Salacia erecta	flower	sépales			0,4–1 mm de long							'sepal length'
	Hippocrateaceae	Salacia erecta	flower	sépales			arrondis au sommet							sepal obtuse'?
	Hippocrateaceae	Salacia erecta	Inflorescences	fascicles										http://purl.obolibrary.org/obo/PO_0025323
	Hippocrateaceae	Salacia erecta	Inflorescences	fascicles			axillaires							missing	fascicles auxillairy
	Hippocrateaceae	Salacia erecta	Inflorescences	fascicles			sessiles							missing	fascicles sessile
	Hippocrateaceae	Salacia erecta	Inflorescences	fascicles			subsessiles							missing	fascicles subsessile
	Hippocrateaceae	Salacia erecta	Inflorescences	fascicles			2–8-flores							missing
	Hippocrateaceae	Salacia erecta	Inflorescences	fascicles			rarement fleurs solitaires							'inflorescence type solitary'
	Hippocrateaceae	Salacia erecta	Inflorescences	bractées			petites							'bract size'
	Hippocrateaceae	Salacia erecta	Inflorescences	bractées			acuminées							'bract acuminate'
	Hippocrateaceae	Salacia erecta	Feuilles	Feuilles										http://purl.obolibrary.org/obo/PO_0025034
	Hippocrateaceae	Salacia erecta	Feuilles	Feuilles			opposées							'leaf opposite'
	Hippocrateaceae	Salacia erecta	Feuilles	Feuilles			subopposées							missing	subopposite
	Hippocrateaceae	Salacia erecta	Feuilles	stipules										http://purl.obolibrary.org/obo/PO_0020041
	Hippocrateaceae	Salacia erecta	Feuilles	stipules			petites							'stipule size'
	Hippocrateaceae	Salacia erecta	Feuilles	stipules			ciliées	±						missing	stipules ciliate
	Hippocrateaceae	Salacia erecta	Feuilles	pétiole										http://purl.obolibrary.org/obo/PO_0020038
	Hippocrateaceae	Salacia erecta	Feuilles	pétiole			de 2–6 mm de long							'petiole length'
	Hippocrateaceae	Salacia erecta	Feuilles	pétiole			canaliculé							'petiole grooved'
	Hippocrateaceae	Salacia erecta	Feuilles	pétiole			à bords ondulés							'petiole margin undulate'
	Hippocrateaceae	Salacia erecta	Feuilles	limbe			oblong-elliptique							missing
	Hippocrateaceae	Salacia erecta	Feuilles	limbe			elliptique							'leaf elliptic'
	Hippocrateaceae	Salacia erecta	Feuilles	limbe			oblong-lancéolé							missing
	Hippocrateaceae	Salacia erecta	Feuilles	limbe			arrondi à la base							missing	rounded at base
	Hippocrateaceae	Salacia erecta	Feuilles	limbe			aigu à la base							missing 'leaf base acute' has been deprecated
	Hippocrateaceae	Salacia erecta	Feuilles	limbe			de 2,5–10 cm de long							'leaf length'
	Hippocrateaceae	Salacia erecta	Feuilles	limbe			1,2–5 cm de large							'leaf width'
	Hippocrateaceae	Salacia erecta	Feuilles	limbe			denté-crénelé							missing	leaf dentated' or 'leaf margin crenate'
	Hippocrateaceae	Salacia erecta	Feuilles	limbe			papyracé							'leaf decreased thickness'	poor match
	Hippocrateaceae	Salacia erecta	Feuilles	limbe			subcoriace							'leaf increased thickness'	poor match
	Hippocrateaceae	Salacia erecta	Feuilles	limbe			± concolore							missing	concolorous
	Hippocrateaceae	Salacia erecta	Feuilles	limbe			± luisant en dessus							missing	shiny above
	Hippocrateaceae	Salacia erecta	Feuilles	nervures secondaires			7–10 paires							http://purl.obolibrary.org/obo/PO_0020140
	Hippocrateaceae	Salacia erecta	Feuilles	nervures secondaires			un peu proéminentes sur les 2 faces surtout en dessous							'leaf midvein prominent'
	Hippocrateaceae	Salacia erecta	plant				Liane							'whole plant lianescent'
	Hippocrateaceae	Salacia erecta	plant				arbuste							'whole plant frutescent'
	Hippocrateaceae	Salacia erecta	plant				glabre							'whole plant glabrous'
	Hippocrateaceae	Salacia erecta	plant				de ± 5 m de haut							'stem height'
	Hippocrateaceae	Salacia erecta	plant				sans fils de latex							'latex absent'
	Hippocrateaceae	Salacia erecta	rameaux											http://purl.obolibrary.org/obo/PO_0004545
	Hippocrateaceae	Salacia erecta	rameaux				rameaux quadrangulaires							'branch angular'	poor match
	Hippocrateaceae	Salacia erecta	rameaux				rameaux cylindriques							'branch cylindrical'
	Hippocrateaceae	Salacia erecta	ramilles											missing	twig
	Hippocrateaceae	Salacia erecta	ramilles				quadrangulaires							'stem quadrangular'
	Hippocrateaceae	Salacia erecta	ramilles				subailées							missing
	Hippocrateaceae	Salacia erecta	ramilles				± papilleuses-rugueuses							'stem rough'	poor match
	Cucurbitaceae	Cucumeropsis mannii	plant				Liane							'whole plant lianescent'
	Cucurbitaceae	Cucumeropsis mannii	plant				herbacée							PATO:0002352
	Cucurbitaceae	Cucumeropsis mannii	plant				monoïque							missing
	Cucurbitaceae	Cucumeropsis mannii	stem											http://purl.obolibrary.org/obo/PO_0025029
	Cucurbitaceae	Cucumeropsis mannii	stem				tiges assez robustes							missing
	Cucurbitaceae	Cucumeropsis mannii	stem				ramifiées							'stem branched'
	Cucurbitaceae	Cucumeropsis mannii	stem				anguleuses							'stem angular'
	Cucurbitaceae	Cucumeropsis mannii	stem				hérissées de quelques poils épars							'stem hispid'	poor match
	Cucurbitaceae	Cucumeropsis mannii	pétiole											http://purl.obolibrary.org/obo/PO_0020038
	Cucurbitaceae	Cucumeropsis mannii	pétiole				de 5–12 cm de long
	Cucurbitaceae	Cucumeropsis mannii	pétiole				pubescent-hirsute
	Cucurbitaceae	Cucumeropsis mannii	pétiole				glabrescent
	Cucurbitaceae	Cucumeropsis mannii	limbe											http://purl.obolibrary.org/obo/PO_0020039
	Cucurbitaceae	Cucumeropsis mannii	limbe				entier
	Cucurbitaceae	Cucumeropsis mannii	limbe				palmé
	Cucurbitaceae	Cucumeropsis mannii	limbe				pentagonal
	Cucurbitaceae	Cucumeropsis mannii	limbe				± profondément 3–5-lobé
	Cucurbitaceae	Cucumeropsis mannii	limbe				de 10–15 cm de long
	Cucurbitaceae	Cucumeropsis mannii	limbe				de 10–15 cm de large
	Cucurbitaceae	Cucumeropsis mannii	limbe				à bord finement ondulé
	Cucurbitaceae	Cucumeropsis mannii	limbe				membraneux
	Cucurbitaceae	Cucumeropsis mannii	limbe				finement scabre sur les 2 faces
	Cucurbitaceae	Cucumeropsis mannii	limbe				vert vif en dessus
	Cucurbitaceae	Cucumeropsis mannii	limbe				vert plus pâle en dessous
	Cucurbitaceae	Cucumeropsis mannii	vrilles											http://purl.obolibrary.org/obo/PO_0025367
	Cucurbitaceae	Cucumeropsis mannii	vrilles				grêles							'leaf tendril decreased thickness'	poor match, because it is strictly speaking not a leaf tendril
	Cucurbitaceae	Cucumeropsis mannii	vrilles				simples							'leaf tendril simple'	poor match, because it is strictly speaking not a leaf tendril
	Cucurbitaceae	Cucumeropsis mannii	vrilles				assez courtes							missing	leaf tendril increased length' exists in Flopo but not 'leaf tendril decreased length'
	Cucurbitaceae	Cucumeropsis mannii	vrilles				pubérulentes							missing	puberulous seems to be missing from Flopo and PATO. I think it is synonymous with downy
	Cucurbitaceae	Cucumeropsis mannii	Fleurs ♂											'flower male'
	Cucurbitaceae	Cucumeropsis mannii	Fleurs ♂				en panicules							'inflorescence type panicle'
	Cucurbitaceae	Cucumeropsis mannii	Fleurs ♂				10–15-flores							http://purl.obolibrary.org/obo/PATO_0001555
	Cucurbitaceae	Cucumeropsis mannii	Fleurs ♂	pédoncule										http://purl.obolibrary.org/obo/PO_0009053
	Cucurbitaceae	Cucumeropsis mannii	Fleurs ♂	pédoncule			grêle							'peduncle decreased thickness'
	Cucurbitaceae	Cucumeropsis mannii	Fleurs ♂	pédoncule			de 3–4 cm de long							'peduncle length'
	Cucurbitaceae	Cucumeropsis mannii	Fleurs ♂	pédicelle										http://purl.obolibrary.org/obo/PO_0025243
	Cucurbitaceae	Cucumeropsis mannii	Fleurs ♂	pédicelle			fin							'pedicel decreased thickness'
	Cucurbitaceae	Cucumeropsis mannii	Fleurs ♂	pédicelle			sans bractée							'bract absent'
	Cucurbitaceae	Cucumeropsis mannii	Fleurs ♂	pédicelle			assez court							missing	pedicel increased length' exists in Flopo but not 'pedicel decreased length'
	Cucurbitaceae	Cucumeropsis mannii	Fleurs ♂	pédicelle			pubérulent							missing	puberulous seems to be missing from Flopo and PATO. I think it is synonymous with downy
	Cucurbitaceae	Cucumeropsis mannii	Fleurs ♂	réceptacle										http://purl.obolibrary.org/obo/PO_0009064
	Cucurbitaceae	Cucumeropsis mannii	Fleurs ♂	réceptacle			campanulé							missing	receptacle campanulate
	Cucurbitaceae	Cucumeropsis mannii	Fleurs ♂	réceptacle			arrondi à la base							missing
	Cucurbitaceae	Cucumeropsis mannii	Fleurs ♂	réceptacle			un peu rétréci à la gorge							missing
	Cucurbitaceae	Cucumeropsis mannii	Fleurs ♂	réceptacle			de 7–8 mm de long							'receptacle length'
	Cucurbitaceae	Cucumeropsis mannii	Fleurs ♂	réceptacle			3–4 mm de large							'receptacle size'	poor match
	Cucurbitaceae	Cucumeropsis mannii	Fleurs ♂	réceptacle			finement pubescent sur les 2 faces							'receptacle pubescent'
	Cucurbitaceae	Cucumeropsis mannii	Fleurs ♂	sépales										http://purl.obolibrary.org/obo/PO_0009031
	Cucurbitaceae	Cucumeropsis mannii	Fleurs ♂	sépales			étalés							missing
	Cucurbitaceae	Cucumeropsis mannii	Fleurs ♂	sépales			de 3 mm de long							'sepal length'
	Cucurbitaceae	Cucumeropsis mannii	Fleurs ♂	sépales			aigus							missing	'sepal acute' has been deprecated Why?
	Cucurbitaceae	Cucumeropsis mannii	Fleurs ♂	pétales										http://purl.obolibrary.org/obo/PO_0009032
	Cucurbitaceae	Cucumeropsis mannii	Fleurs ♂	pétales			de 3–5 mm de long							'petal length'
	Cucurbitaceae	Cucumeropsis mannii	Fleurs ♂	pétales			2 mm de large							'petal size'	poor match
	Cucurbitaceae	Cucumeropsis mannii	Fleurs ♂	pétales			jaune crème							http://purl.obolibrary.org/obo/PATO_0001286
	Cucurbitaceae	Cucumeropsis mannii	Fleurs ♂	pétales			pubescents sur les 2 faces							'petal pubescent'
	Cucurbitaceae	Cucumeropsis mannii	Fleurs ♂	anthères										http://purl.obolibrary.org/obo/PO_0009066
	Cucurbitaceae	Cucumeropsis mannii	Fleurs ♂	anthères			à loges bordées de poils							'anther hairy'
	Cucurbitaceae	Cucumeropsis mannii	Fleurs ♂	anthères			connectif élargi							?
	Cucurbitaceae	Cucumeropsis mannii	Fleurs ♂	anthères			pistillode glanduleux							'pistillode glandular'
	Cucurbitaceae	Cucumeropsis mannii	Fleurs ♀											'flower female'
	Cucurbitaceae	Cucumeropsis mannii	Fleurs ♀				solitaires							'inflorescence type solitary'
	Cucurbitaceae	Cucumeropsis mannii	Fleurs ♀	ovaire										http://purl.obolibrary.org/obo/PO_0009072
	Cucurbitaceae	Cucumeropsis mannii	Fleurs ♀	ovaire			ovoïde-oblong							missing
	Cucurbitaceae	Cucumeropsis mannii	Fleurs ♀	stigmates										http://purl.obolibrary.org/obo/PO_0009073
	Cucurbitaceae	Cucumeropsis mannii	Fleurs ♀	stigmates			bilobés							'stigma bilobed'
	Cucurbitaceae	Cucumeropsis mannii	Baies											'fruit type berry'
	Cucurbitaceae	Cucumeropsis mannii	Baies				ovoïdes							'fruit ovate'
	Cucurbitaceae	Cucumeropsis mannii	Baies				claviformes							'fruit clavate'
	Cucurbitaceae	Cucumeropsis mannii	Baies				lisses							'fruit smooth'
	Cucurbitaceae	Cucumeropsis mannii	Baies				de 8–10 cm de long							'fruit length'
	Cucurbitaceae	Cucumeropsis mannii	Baies				et 3 cm de diam							'fruit diameter'
	Cucurbitaceae	Cucumeropsis mannii	Baies				jaunes							'fruit yellow'
	Cucurbitaceae	Cucumeropsis mannii	Baies				rayées de vert à maturité							missing
	Cucurbitaceae	Cucumeropsis mannii	Baies	graines										http://purl.obolibrary.org/obo/PO_0009010
	Cucurbitaceae	Cucumeropsis mannii	Baies	graines			renfermant de nombreuses graines							missing	could be made from PATO 'has number of' http://purl.obolibrary.org/obo/PATO_0001555
	Cucurbitaceae	Cucumeropsis mannii	Baies	graines			ovales							'seed ovate'
	Cucurbitaceae	Cucumeropsis mannii	Baies	graines			comprimées							'seed laterally compressed'
	Cucurbitaceae	Cucumeropsis mannii	Baies	graines			blanchâtres							'seed white'
	Cucurbitaceae	Cucumeropsis mannii	Baies	graines			de 16–18 mm de long							'seed length'
	Cucurbitaceae	Cucumeropsis mannii	Baies	graines			7 mm de large							'seed width'
	Cucurbitaceae	Cucumeropsis mannii	Baies	graines			2 mm d'épaisseur							'seed thickness'
	Cucurbitaceae	Cucumeropsis mannii	Baies	graines			à bords minces							missing
	Cucurbitaceae	Cucumeropsis mannii	Baies	graines			sans marges							missing	without margin
	Oxalidaceae	Oxalis	capsule				loculicides							http://purl.obolibrary.org/obo/PO_0025270
	Oxalidaceae	Oxalis	capsule	valves		persistantes								http://purl.obolibrary.org/obo/PO_0000033 and http://purl.obolibrary.org/obo/PATO_0000082
	Oxalidaceae	Oxalis	capsule				dressées (erect)			à maturité				fruit type capsule' and http://purl.obolibrary.org/obo/PATO_0000622
	Oxalidaceae	Oxalis	seed	seed	tégument		charnu (fleshy)							'integument fleshy'
	Oxalidaceae	Oxalis	seed	seed	tégument		arilliforme	séparant élastiquement						http://purl.obolibrary.org/obo/PO_0019022
	Oxalidaceae	Oxalis	flower	flower		colour	jaunes							'petal yellow'
	Oxalidaceae	Oxalis	flower	flower		colour	roses							'petal pink'
	Oxalidaceae	Oxalis	flower	flower		colour	rouges							'petal red'
	Oxalidaceae	Oxalis	flower	flower		colour	violacées							'petal purple'
	Oxalidaceae	Oxalis	flower	flower		colour	blanches							'petal white'
	Oxalidaceae	Oxalis	flower	flower			cleistogames							missing
	Oxalidaceae	Oxalis	flower	flower			bractéoles				Present			'bracteole present'
	Oxalidaceae	Oxalis	flower	bractéoles							Absent			'bracteole absent'
	Oxalidaceae	Oxalis	flower	sépales				5						http://purl.obolibrary.org/obo/PO_0009031
	Oxalidaceae	Oxalis	flower	sépales			imbriqués							calyx overlapping'
	Oxalidaceae	Oxalis	flower	sépales			munis de callosités	parfois	vers le sommet					missing
	Oxalidaceae	Oxalis	flower	pétales				5						http://purl.obolibrary.org/obo/PO_0009032
	Oxalidaceae	Oxalis	flower	pétales			tordus							http://purl.obolibrary.org/obo/PATO_0002445
	Oxalidaceae	Oxalis	flower	étamines				10						http://purl.obolibrary.org/obo/PO_0009029
	Oxalidaceae	Oxalis	flower	étamines			fertiles	toutes						http://purl.obolibrary.org/obo/PATO_0000955
	Oxalidaceae	Oxalis	flower	étamines			connées	±	à la base en un anneau					missing
	Oxalidaceae	Oxalis	flower	étamines			les 5 externes plus petites							missing
	Oxalidaceae	Oxalis	flower	anthères			basifixes							missing
	Oxalidaceae	Oxalis	flower	anthères		déhiscence	longitudinale							'longitudinal orientation'	seems to be no anther dehiscense
	Oxalidaceae	Oxalis	flower	styles				5						http://purl.obolibrary.org/obo/PO_0009074
	Oxalidaceae	Oxalis	flower	styles			hétéromorphes							missing heterostylous
	Oxalidaceae	Oxalis	Inflorescences											http://purl.obolibrary.org/obo/PO_0009049
	Oxalidaceae	Oxalis	Inflorescences				axillaires							http://purl.obolibrary.org/obo/PATO_0002497	assumed to be s synonym of 'lateral orientation'
	Oxalidaceae	Oxalis	Inflorescences				caulinaires							http://purl.obolibrary.org/obo/PATO_0002350
	Oxalidaceae	Oxalis	Inflorescences				ombelles simples							http://purl.obolibrary.org/obo/PATO_0001503 and 'inflorescence type umbel'
	Oxalidaceae	Oxalis	Inflorescences				cymes							'inflorescence type cyme'
	Oxalidaceae	Oxalis	Inflorescences				fleurs solitaires	parfois						'inflorescence type solitary'
	Oxalidaceae	Oxalis	leaves				alternes							'leaf alternate placement'	also in PATO (http://purl.obolibrary.org/obo/PATO_0001932)
	Oxalidaceae	Oxalis	leaves	stipules		presence					present			http://purl.obolibrary.org/obo/PO_0020041
	Oxalidaceae	Oxalis	leaves	stipules		presence					absent			'stipule absent'
	Oxalidaceae	Oxalis	leaves				digitées	3- à plurifoliolées						palmate leaf' or 'leaf trifoliolate'	http://purl.obolibrary.org/obo/PO_0020046 or http://purl.obolibrary.org/obo/PATO_0001980
	Oxalidaceae	Oxalis	leaves				pennées	3-4-foliolées						http://purl.obolibrary.org/obo/PO_0020045 or http://purl.obolibrary.org/obo/PATO_0000410
	Oxalidaceae	Oxalis	leaves				1- foliolées	rarement						http://purl.obolibrary.org/obo/PO_0020042	?
	Oxalidaceae	Oxalis	leaves				transformées en phyllodes							'phyllode leaf'	http://purl.obolibrary.org/obo/PO_0025335
	Oxalidaceae	Oxalis	leaves	folioles			entières							missing leaflet entire
	Oxalidaceae	Oxalis	leaves	folioles			émarginées	±	au sommet					'leaflet emarginate'
	Oxalidaceae	Oxalis	leaves	folioles			bilobées		au sommet					'leaflet bilobed'
	Oxalidaceae	Oxalis	leaves	folioles			munies de callosités	parfois						?
	Oxalidaceae	Oxalis	plant				acaules (acaulescent)							missing acaulescent
	Oxalidaceae	Oxalis	plant				caulescentes							missing caulescent
	Oxalidaceae	Oxalis	plant				annuelles							missing annual
	Oxalidaceae	Oxalis	plant				vivaces							missing perennial
	Oxalidaceae	Oxalis	plant				bulbes	souvent						http://purl.obolibrary.org/obo/PO_0025356
	Oxalidaceae	Oxalis	plant				rhizomes	souvent						http://purl.obolibrary.org/obo/PO_0004542
	Basellaceae	Basella alba	plant				Herbe							'whole plant herbaceous'
	Basellaceae	Basella alba	plant				vivace							missing perennial
	Basellaceae	Basella alba	plant				glabre							'whole plant glabrous'
	Basellaceae	Basella alba	Tige											http://purl.obolibrary.org/obo/PO_0025029
	Basellaceae	Basella alba	Tige				grêle							'stem decreased thickness'
	Basellaceae	Basella alba	Tige				peu ramifiée							http://purl.obolibrary.org/obo/PATO_0000402
	Basellaceae	Basella alba	Tige				atteignant plusieurs mètres de haut							'stem height'
	Basellaceae	Basella alba	Tige				0,5 cm de diam.							'stem diameter'
	Basellaceae	Basella alba	Tige	entre-nœuds			de 5–12 cm de long							'shoot internode length'
	Basellaceae	Basella alba	Feuilles											http://purl.obolibrary.org/obo/PO_0025034
	Basellaceae	Basella alba	Feuilles	pétiole										http://purl.obolibrary.org/obo/PO_0020038
	Basellaceae	Basella alba	Feuilles	pétiole			de 3–5 cm de long							'petiole length'
	Basellaceae	Basella alba	Feuilles											http://purl.obolibrary.org/obo/PO_0025396
	Basellaceae	Basella alba	Feuilles	limbe			un peu charnu							'leaf fleshy'
	Basellaceae	Basella alba	Feuilles	limbe			entier							'leaf margin entire'
	Basellaceae	Basella alba	Feuilles	limbe			typiquement cordé							'leaf base cordate'
	Basellaceae	Basella alba	Feuilles	limbe			apiculé							'leaf tip shape'	poor match
	Basellaceae	Basella alba	Feuilles	limbe			aigu							'leaf tip shape'	poor match 'leaf tip acute' has been deprecated
	Basellaceae	Basella alba	Feuilles	limbe			mais parfois (en culture?) obtus et même suborbiculaire							'leaf orbicular'
	Basellaceae	Basella alba	Feuilles	limbe			ovale							'leaf elliptic'
	Basellaceae	Basella alba	Feuilles	limbe			de 5–12 cm de long							'lamina length'
	Basellaceae	Basella alba	Feuilles	limbe			de 4–8 cm de large							'lamina width'
	Basellaceae	Basella alba	Feuilles	feuilles supérieures										missing upper leaves
	Basellaceae	Basella alba	Feuilles	feuilles supérieures			plus petites							http://purl.obolibrary.org/obo/PATO_0000587
	Basellaceae	Basella alba	Épis											'inflorescence type spike'
	Basellaceae	Basella alba	Épis				axillaires							?
	Basellaceae	Basella alba	Épis axillaires				pouvant atteindre 25 cm de long (fructifiés) dont 1/3 pour le pédoncule, mais ordinairement plus courts							'inflorescence length'
	Basellaceae	Basella alba	Fleurs											http://purl.obolibrary.org/obo/PO_0009046
	Basellaceae	Basella alba	Fleurs				± 20 par épi							missing nunber of flowers in inflorescence
	Basellaceae	Basella alba	Fleurs				formant en bouton							missing forming buttons
	Basellaceae	Basella alba	Fleurs				un cône dense puis séparées,les inférieures d'abord, par des entre-nœuds de ± 1 cm de long
	Basellaceae	Basella alba	périgone											missing perigonium
	Basellaceae	Basella alba	périgone				blanc							'flower white'
	Basellaceae	Basella alba	périgone				ovoïde							'flower ovate'
	Basellaceae	Basella alba	périgone				de 5 mm de long							'flower length'
	Basellaceae	Basella alba	Fruit											http://purl.obolibrary.org/obo/PO_0009001
	Basellaceae	Basella alba	Fruit				subsphérique							'fruit spheroid'	poor match
	Basellaceae	Basella alba	Fruit				de 5–6 mm de diam.							'fruit diameter'
	Basellaceae	Basella alba	Fruit				rouge violacé							'fruit violet'
	Basellaceae	Basella alba	Fruit				noir							'fruit black'
	Basellaceae	Basella alba	Fruit				les fleurs supérieures avortent souvent en culture?							?
	Basellaceae	Basella alba	Graine											http://purl.obolibrary.org/obo/PO_0009010
	Basellaceae	Basella alba	Graine	tégument										integument
	Basellaceae	Basella alba	Graine	tégument			brun							'integument brown'
	Basellaceae	Basella alba	Graine	albumen										http://purl.obolibrary.org/obo/PO_0009089
	Basellaceae	Basella alba	Graine	albumen			farineux							missing endosperm flowery
