# Supplementary material for: The flora phenotype ontology (FLOPO): tool for integrating morphological traits and phenotypes of vascular plants
Source: J Biomed Semantics. 2016 Nov 14;7:65. doi: 10.1186/s13326-016-0107-8 (PMC5109718; doi:10.1186/s13326-016-0107-8)
Supplement: Additional file 2 — Annotation of Floras 2. The file contains the manual annotation of Salacia erecta, Andropogon chinensis, Oxalis, and Anisopappus chinensis. The file includes identified phenotypes and the mapping to FLOPO. It also highlights missing classes in PATO or PO. (XLSX 36 kb) [file 13326_2016_107_MOESM2_ESM.xlsx]

## Sheet: Salacia erect
mainsubject	subject	subpart	category	value	posit	mod	phase	presence	flopo status	flopo text	flopo uri	Comment
plant	plant		dimension	('15', 'm.', 'in_height')		to				whole plant size	FLOPO:0014827	perhaps whole plant height better?
plant	plant		life-form	shrub		Glabrous				whole plant frutescent	FLOPO:0900034	these growth forms are not everyday terms
plant	plant		life-form	liane		Glabrous				whole plant lianescent	FLOPO:0900035
plant	plant		indumentum	glabrous						whole plant glabrous	FLOPO:0000090
plant		latex threads	presence	absent				Present		latex absent	FLOPO:0900051
stem	stem		shape	-angled		4				stem quadrangular	FLOPO:0006089
stem	stem		presence	paired ridges		paired		Present		stem ridged	FLOPO:0007098
stem	stem		coloration	green						stem green	FLOPO:0003233
stem	stem		coloration	purplish						stem purple	FLOPO:0000810
stem	stem		shape	terete			becoming			stem cylindrical	FLOPO:0000351	What about "becoming"
stem	stem		coloration	grey		dark purplish	becoming			stem grey	FLOPO:0000413	do we need a "dark purplish grey"
stem	stem		texture	smooth						stem smooth	FLOPO:0002643
stem	stem		texture	rough						stem rough	FLOPO:0004713
stem	stem	lenticel	presence	lenticel		conspicuous raised		Present		lenticel conspicuous	FLOPO:0016951
stem	stem	lenticel	presence	lenticel		conspicuous raised		Present		lenticel raised	FLOPO:0006508
leaves	leaves		arrangement	opposite						leaf opposite	FLOPO:0000420	Should be leaves or leaf arrangement
leaves	leaves		arrangement	subopposite					missing PATO			Missed subopposite
leaves	leaves		arrangement	alternate						leaf alternate placement	FLOPO:0001032
leaves	leaves		architecture	petiolate						petiole present	FLOPO:0007292
leaves	petiole		dimension	('3–6', 'mm.', 'long')						petiole length	FLOPO:0001795
leaves	petiole	margin	presence	margin		conspicuously undulate		Present		petiole margin undulate	FLOPO:0007082	I was surprised to find this
leaves	blade		texture	papery					missing PATO			I can't find papery or coriaceous
leaves	blade		texture	coriaceous		sub			missing PATO
leaves	blade		coloration	green	above	usually glossy; dark				lamina dark green	FLOPO:0006234	What about upper and lower side of leaf?
			coloration	glossy	above				missing combo			Where are glossy and dull? PATO has glistening
leaves	blade		compar	paler	beneath				missing comparative			Comparative again
leaves	blade		shape	elliptic		usually				lamina elliptic	FLOPO:0000913	Lamina and leaf overlap
leaves	blade		shape	lanceolate		sometimes				lamina lanceolate	FLOPO:0001766
leaves	blade		dimension	('(2.5–)3.5–11(–15)', 'cm.', 'long')						lamina length	FLOPO:0000288	both leaf lamina length and lamina length
leaves	blade		dimension	('1.7–4.5(–9)', 'cm.', 'wide')						lamina width	FLOPO:0001898
leaves	blade	apex	shape	acuminate		usually bluntly				lamina acuminate	FLOPO:0000332	lots of acuminates mostly nonsensical
leaves	blade	apex	shape	obtuse		rarely				leaf apex obtuse	FLOPO:0022436
leaves	blade	apex	shape	retuse						lamina retuse	FLOPO:0013240	leaf apex retuse better?
leaves	blade	base	shape	cuneate TO almost rounded	at the base					leaf base cuneate	FLOPO:0009058
leaves	blade	base	shape	cuneate TO almost rounded	at the base				missing PATO			where is rounded? Obtuse not the same!
leaves	blade	vein	presence		beneath	fine slightly prominent reticulate		Present	missing PATO			no reticulate!
leaves		margin	shape	serrate TO subentire				Present		leaf margin serrate	FLOPO:0900074
leaves		margin	shape	serrate TO subentire				Present	missing combo			leaf margin entire is flopoed
inflorescence	inflorescence		pubescence	glabrous						inflorescence glabrous	FLOPO:0002244
inflorescence	inflorescence	fascicle	position	sessile		few-flowered			missing PATO			There are a lot of "flower fascicle" categories, most nonsensical; sessile not in PATO
inflorescence	inflorescence	fascicle	architecture	few-flowered		few-flowered			missing			? Few-flowred
inflorescence	inflorescence	fascicle	architecture	axillary					missing PATO			"axillary" missing as a position
inflorescence	inflorescence	fascicle	architecture	shortly pedunculate axillary				Present		inflorescence type fascicle	FLOPO:0907000
inflorescence	bract		shape	ovate						bract ovate	FLOPO:0000632
inflorescence	bract		dimension	('0.5–1', 'mm.', 'long')		±				bract length	FLOPO:0000912
inflorescence	bract		shape	fimbriate					missing combo			fimbriated? Wrong spelling
inflorescence	pedicel		dimension	('4–8(–10)', 'mm.', 'long')			at anthesis			pedicel length	FLOPO:0001542	what about qualifiers like "at anthesis"
inflorescence	pedicel		architecture	articulated	at the base				sort of PATO problem	pedicel articulated with	FLOPO:0001085	why "with". And no place for where.
bud	bud		shape	ovoid						bud ovate	FLOPO:0004157	ovate is incorrect. Should be 3-d form
bud	bud		shape	conical						bud conical	FLOPO:0004288
bud	bud		dimension	('2–3', 'mm.', 'long')						bud length	FLOPO:0000835
flower	flower		coloration	yellow		greenish			sort of PATO	flower yellow green	FLOPO:0010922	Not quite right
flower	flower		coloration	orange		sometimes				flower orange	FLOPO:0018524
flower	flower		dimension	('7–9', 'mm.', 'in_diameter')		±				flower diameter	FLOPO:0003435
flower	flower	sepal	fusion	free				Present	missing combo			Have tepal free, but not sepal
flower	flower	sepal	fusion	joined	at the base	very shortly			sort of	petal fused	FLOPO:0014367	there are fused categories but no joined or united
flower	flower	sepal	comparison	unequal					missing comparative			no equal or same-sized?
flower	flower	sepal	shape	ovate						sepal ovate	FLOPO:0000569
flower	flower	sepal	shape	semicircular					missing combo			various things semicurcular, but not sepals
flower	flower	sepal	dimension	('0.5–1', 'mm.', 'long')						sepal length	FLOPO:0003464
flower	flower	sepal	shape	rounded					missing PATO
flower	flower	sepal	shape	fimbriate					missing combo
petal	petal		shape	oblong						petal oblong	FLOPO:0000613
petal	petal		dimension	('3–4', 'mm.', 'long')						petal length	FLOPO:0001283
petal	petal		shape	rounded					missing PATO
petal	petal		shape	entire					missing PATO			margin entire only on leaf; PATO missing edge shape entire
disc	disc		shape	pad					missing
disc	disc	pad	dimension	('2–2.5', 'mm.', 'in_diameter')		±		Present	missing PO			no disc; just discoid shape
stamen	stamen	filament	dimension	('1.5–2', 'mm.', 'long')		slender flattened		Present		filament flattened	FLOPO:0005973
stamen	stamen	filament	dimension	('1.5–2', 'mm.', 'long')		slender flattened		Present		filament slender	FLOPO:0022229
stamen	stamen	filament	size	widened	at the base				missing PATO			increased width in PATO
ovary	ovary		shape	trigonous					missing PO			why "ovary wall" but no ovary? Problem with PO has "plant ovary" but not "ovary"?
ovary	ovary		shape	-lobed		3			missing PO
ovary	ovary	style	dimension	('0.5', 'mm.', 'long')		±		Present		style length	FLOPO:0003003
ovary	ovary	style	shape	conical						style conical	FLOPO:0002529
ovary	stigma		shape	punctiform						stigma punctiform	FLOPO:0006387
ovary	ovule		count	(2–)4–6		per; locule			missing PO			problem with "plant ovule" but no synonym "ovule"
fruit	fruit		coloration	orange						fruit orange	FLOPO:0003923
fruit	fruit		shape	globose		±	at maturity			fruit spheroid	FLOPO:0012011	globose or spheroidal better
fruit	fruit		shape	oblong			at maturity			fruit oblong	FLOPO:0000291
fruit	fruit		shape	apiculate		often			missing PATO			apiculate a synonym for "sharpness" in PATO, but is a type of sharpness!
fruit	fruit		dimension	('1–2.5(–3)', 'cm.', 'in_diameter')						fruit diameter	FLOPO:0003073
fruit	fruit		relief	smooth						fruit smooth	FLOPO:0000928
fruit	fruit		relief	warted	especially towards the apex	sometimes				fruit warty	FLOPO:0002514

## Sheet: Oxalis
mainsubject	subject	subpart	category	value	posit	mod	phase	presence	flopo status	flopo text	flopo uri	Comment
plant	plant		architecture	caulescent					missing
plant	plant		architecture	acaulescent					missing
plant	plant	herb	life-form	herb		acaulescent annual or perennial		Present		whole plant herbaceous	FLOPO:0022142
plant	plant		life-form	annual					missing
plant	plant		life-form	perrenial					missing
plant	plant		architecture	bulbous		usually			sort of	bulb bulbous?	FLOPO:0009971	Description shold make more clear what "bulbous" refers to.
plant	plant		habit	suffruticose		occasionally			missing
leaves	leaves		position	radical					missing
leaves	leaves		position	cauline					sort of	leaf cauline to	FLOPO:0001022	Should be just cauline -- to stem is implicit
leaves	leaves		arrangement	alternate						leaf alternate placement	FLOPO:0001032
leaves	leaves		arrangement	in a cluster		often		Present	missing			Grouping terms needed
leaves	leaves		architecture	-foliolate		pinnately 3				leaf pinnate	FLOPO:0000872
leaves	leaves		architecture							leaf trifoliolate	FLOPO:0900067
leaves	leaves		architecture	-foliolate		sometimes 1			missing			Can't find any other way of giving leaflet count!
leaves	leaves		architecture	-foliolate		digitately 3			missing
flower	flower		architecture	actinomorphic						flower actinomorphic	FLOPO:0001316
flower	flower		architecture	heterostylous		usually			missing
flower	flower		architecture	homostylous					missing
flower	flower		structure-infl	solitary						inflorescence type solitary	FLOPO:0900007
flower	flower			subtended	by bracts				sort of	inflorescence bract basal to	FLOPO:0023775	Almost!
flower	flower		structure-infl	in pseudumbels					sort of	inflorescence type umbel	FLOPO:0900003	Almost!
flower	flower	cyme	structure-infl	cyme				Present		inflorescence type cyme	FLOPO:0900006
petal	petal		aestivation	contorted					missing
petal	petal		architecture	unguiculate					missing			missed clawed and unguiculate
petal	claw		architecture	± coherent to_form a false tube		± coherent			missing
stamen	stamen		count	10					sort of	stamen amount <=10	FLOPO:0907309	No way to count things!
stamen	stamen		arrangement	-seriate		2			missing			Can't find arrangements
stamen	stamen		compar	outer 5 shorter	outer	5			missing			Comparisons?
stamen	stamen		arrangement	opposite the petals					sort of	stamen opposite	FLOPO:0010558	Opposite what?
stamen	stamen		compar	inner 5 longer	inner	5			missing
stamen	stamen		arrangement	innder 5 opposite the sepals	inner				missing
stamen	stamen			vestiges
stamen	stamen	third whorl	presence	present		sometimes		Present	obscure
stamen	filament		fusion	connate	at the base	usually			missing			Missed joined and connate
stamen	filament	appendage	presence	with dentate appendages				Present	missing
stamen	anther		dehiscence	introrse in bud			in bud		missing			introrse and extrorse?
stamen	anther		prep	dehiscing_by; slits					missing			missed anther dehiscence
ovary	ovary	ovule	presence	several ovules	in each loculus	several		Present	missing
ovary	ovule		orientation	anatropous					missing			Lots about ovule primordium but not about the ovule!
capsule	capsule		dehiscence	loculicidally dehiscent		loculicidally			missing
seed	seed	endosperm	presence	present						endosperm present	FLOPO:0005861
seed	seed	endosperm	presence	absent				Absent		endosperm absent	FLOPO:0000630
seed	seed	testa	shape	everts explosively ejecting the contents		everts; explosively	eventually	Present	obscure			Unusual seed character...
seed	seed	testa	texture	becomes fleshy		which becomes		Present		testa fleshy	FLOPO:0003062

## Sheet: Andropogon chinensis
mainsubject	subject	subpart	category	value	posit	mod	phase	presence	flopo status	flopo text	flopo uri	Comment
plant	plant		life_style	perennial					missing
plant	plant		architecture	tufted		Tufted			missing			some synonym to tufted somewhere?
testing	culm		dimension	('60–200', 'cm.', 'high')					missing			ditto for culm
leaf-blades	leaf-blades		dimension	('10–40', 'cm.', 'long')						leaf lamina length	FLOPO:0024014
leaf-blades	leaf-blades		dimension	('1–8', 'mm.', 'wide')						lamina width	FLOPO:0001898	no leaf lamina width, but leaf width
leaf-blades	leaf-blades		pubescence	glabrous						leaf lamina glabrous	FLOPO:0006413
leaf-blades	leaf-blades		pubescence	pubescent						leaf lamina pubescent	FLOPO:0002426
leaf-blades	leaf-blades		coloration	glaucous		±			missing			no glaucous
leaf-blades	leaf-blades	sheath-auricles	presence					present		leaf sheath auriculate	FLOPO:0016002
leaf-blades	leaf-blades	sheath-auricles	dimension	('4', 'mm.', 'long')		up_to			missing			no place to put length, but can mark presence
inflorescence	inflorescence		arrangement	paired					missing			no arrangement terms
inflorescence	inflorescence	raceme	position	exserted from	linear spatheoles			Present	sort of	inflorescence exserted	FLOPO:0003782	in this case needs exserted from…
inflorescence	inflorescence			spatheoles		linear		Present	missing			kind of leaf sheath
inflorescence	inflorescence	raceme		gathered into		false panicle			sort of	inflorescence type panicle	FLOPO:0900004	obviously no "false panicle"
inflorescence	inflorescence	false panicle	architecture	loose						inflorescence loose	FLOPO:0003323
inflorescence	inflorescence	false panicle		scanty		sometimes			missing			no scanty…
inflorescence	raceme		dimension	('3–7(–10)', 'cm.', 'long')						inflorescence length	FLOPO:0000228
inflorescence	raceme		pubescence	pilose TO villous					sort of	inflorescence pilosity	FLOPO:0001399	pilosity? Many hair terms missing
testing	internode		subject	cuneate					obscure			how is an internode cuneate; problem in description?
testing	pedicel	pedicel	subject	cuneate				Present		pedicel cuneate	FLOPO:0012273
testing	pedicel		shape	ciliate	on both margins				missing			no ciliate
testing	pedicel	hair	dimension	('1–3', 'mm.', 'long')				Present	sort of	trichome length	FLOPO:0002728	obviously no "pedicel trichome" or hair or cilia
spikelet	spikelet		subject	spikelet		Sessile
spikelet	spikelet		dimension	('5–8', 'mm.', 'long')		including a short callus			sort of	tassel sessile spikelet length	FLOPO:0000177	have tassel spikelet from maize?
spikelet	spikelet	callus	presence			short		Present	missing			no callus -- grass term
testing	lower glume		shape	linear	lower	glume				lower glume linear	FLOPO:0005288
testing	lower glume		shape	depressed	between the dorsal keels	deeply			sort of	lower glume V-shaped	FLOPO:0015578	?
testing	lower glume		pubescence	glabrous						lower glume glabrous	FLOPO:0008964
testing	upper glume	awn	dimension	('(1–)4–12', 'mm.', 'long')				Present		upper glume length	FLOPO:0013278
testing	upper lemma		subject	lemma		upper						lemmas are here
testing	upper lemma		shape	bidentate		bi			missing			but no upper lemma dentate
testing	upper lemma	awn	dimension	('2–3.5', 'cm.', 'long')				Present		awn length	FLOPO:0002741
spikelet	spikelet		subject	spikelet		Pedicelled				spikelet pedicellate	FLOPO:0003293
spikelet	spikelet		shape	lanceolate TO narrowly elliptic						spikelet lanceolate	FLOPO:0000230
spikelet	spikelet		shape	lanceolate TO narrowly elliptic						spikelet elliptic	FLOPO:0004910
spikelet	spikelet		dimension	('4–7', 'mm.', 'long')						spikelet length	FLOPO:0002393
spikelet	spikelet		coloration	pallid TO purplish						spikelet purple	FLOPO:0013108	no pallid
spikelet	spikelet		pubescence	glabrous TO pilose						spikelet glabrous	FLOPO:0006113
spikelet	spikelet		pubescence	glabrous TO pilose					sort of	spikelet pilosity	FLOPO:0006114
spikelet	spikelet	awn	count	2					sort of	awn amount	FLOPO:0016563	No "spikelet awn"
spikelet	spikelet	longer awn	dimension	('(2–)4–10', 'mm.', 'long')					sort of	awn length	FLOPO:0002741
spikelet	spikelet	shorter awn	compar	shorter					sort of	awn length	FLOPO:0002741	how to do shorter
spikelet	spikelet	shorter awn		suppressed		sometimes			sort of	awn absent	FLOPO:0016562	no "shorter spikelet awn"

## Sheet: Anisopappus chinensis
mainsubject	subject	subpart	category	value	posit	mod	phase	presence	flopo status	flopo text	flopo uri	Comment
plant	plant		life-form	herb						whole plant herbaceous	FLOPO:0022142
rhizome	plant		life-style	annual					missing
rhizome	rhizome		fragility	stout					sort of	rhizome fleshy	FLOPO:0000659	What exactly does stout mean?
rhizome	rhizome		dimension	('5-12', 'mm', 'in_diam')						rhizome diameter	FLOPO:0004848
stem	stem		habit	erect						stem erect	FLOPO:0001021
stem	stem		dimension	('40-100', 'cm', 'tall')						stem height	FLOPO:0022260
stem	stem		dimension	('2-4(-6)', 'mm', 'diam.')						stem diameter	FLOPO:0000875
stem	stem		architecture	simple						stem simple	FLOPO:0000395
stem	stem		habit	caespitose		rarely			missing			Means in clusters -- did I miss a class?
stem	stem			stripes		slender			missing			no stripes
stem	stem		texture	woody	at base	sub			sort of	shoot axis woodiness	FLOPO:0900038	this would be the character; as always what about "at the base"
stem	stem		pubescence	pubescent	in lower part	densely rusty	during anthesis		missing			colours for pubescnece?
stem	stem		pubescence	pubescent	in lower part	sparsely	during anthesis			stem pubescent	FLOPO:0000364
leaves	leaves		subject	leaves		Cauline			sort of	leaf cauline to	FLOPO:0001022
leaves	leaves		shape	oblong		narrowly				leaf oblong	FLOPO:0000103	narrowly?
leaves	leaves		shape	lanceolate		ovate				leaf lanceolate	FLOPO:0000005
leaves	leaves		dimension	('3-6', 'cm', 'long')						leaf length	FLOPO:0001133
leaves	leaves		dimension	('1-2', 'cm', 'wide')						leaf width	FLOPO:0004627
leaves	leaves		texture	papery					missing
leaves	leaves	both_surfaces	pubescence	pubescent		slightly		Present		leaf pubescent	FLOPO:0000818
leaves	leaves		pubescence	pubescent		more densely so along veins		Present		complex
leaves	leaves	base	shape	truncate				Present	sort of	leaf truncated	FLOPO:0001999	should have a "leaf base truncate" and not truncated!
leaves	leaves	base	shape	cuneate		broadly		Present		lamina cuneate	FLOPO:0000684	no leaf base cuneate, but a leaf apex cuneate!
leaves	leaves	margin	shape	serrate		obtusely		Present		leaf margin serrate	FLOPO:0900074
leaves	leaves	apex	shape	obtuse				Present	missing			missed obtuse in leaf apex shapes
capitula	capitula		subject	capitula								didn't get captitula
capitula	capitula		structure-infl	solitary						inflorescence type solitary	FLOPO:0900007
capitula	capitula		structure-infl	several in terminal corymbs					missing			missed corymb
testing	peduncle		subject	peduncle
testing	peduncle		pubescence	pubescent		densely				peduncle pubescent	FLOPO:0000635
involucre	involucre		subject	involucre
involucre	involucre		shape	hemispheric					sort of	involucre convex 3-D shape	FLOPO:0000628
involucre	involucre		size	6-10 mm.						involucre diameter	FLOPO:0000421
testing	phyllary		architecture	phyllary	in 3 series				missing			missed phyllary - compositae tech term
testing	phyllary		shape	linear		broadly			sort of	bract linear	FLOPO:0000112
testing	phyllary		shape	lanceolate		narrowly			sort of	bract lanceolate	FLOPO:0000584
testing	phyllary		size	3-5 mm. long					sort of	bract length	FLOPO:0000912
testing	phyllary		size	1.5 mm. wide		ca.			missing	bract size	FLOPO:0010677	bract width?
testing	phyllary		pubescence	pubescent	dorsally	densely				bract pubescent	FLOPO:0001675
testing	phyllary	margin	texture	membranous				Present	missing			no bract margin
testing	phyllary	apex	shape	obtuse				Present	missing			bract apex shape?
paleae	paleae		shape	keeled					missing			lots about keel, but on what
paleae	paleae		texture	membranous					missing			no membranous
paleae	paleae		size	5 mm. Long		ca.				palea length	FLOPO:0011277
floret	floret		subject	floret		Marginal			missing			for some reason have "disk flower" but not "ray flower"
floret	floret	marginal	reproduction	female					missing	flower female	FLOPO:0000220
floret	marginal floret	corolla	coloration	yellow					missing	corolla yellow	FLOPO:0000493
floret	marginal floret	lamina	shape	obtriangular					missing	lamina triangular	FLOPO:0002031	no corolla lamina
floret	marginal floret	lamina	dimension	('6.5', 'mm', 'long')					missing	lamina length	FLOPO:0000288
floret	marginal floret	lamina	dimension	('2', 'mm', 'wide')					missing	lamina width	FLOPO:0001898
floret	marginal floret	lamina	shape	truncate	apex			Present	missing
floret	marginal floret	lamina	shape	dentate					missing	corolla dentated	FLOPO:0002335
floret	disk floret		subject	disk
floret	disk floret	floret	reproduction	bisexual				Present		disk flower hermaphrodite	FLOPO:0011082
floret	disk floret	corolla	subject	corolla
floret	disk floret	corolla	shape	tubular						disk flower tubular	FLOPO:0012461
floret	disk floret	corolla	size	3 mm. long		ca.				disk flower length	FLOPO:0003860
floret	disk floret	corolla lobe	count	3		short triangular		Present		disk flower lobed	FLOPO:0008300
achene	achene		subject	achene					missing			no achene
achene	achene		shape	columnar					missing			no fruit columnar
achene	achene		pubescence	pubescent		sparsely			sort of	fruit pubescent	FLOPO:0000317
achene	achene	apex	shape	truncate				Present	sort of	fruit truncated	FLOPO:0000031
achene	achene		size	narrower	to base	slightly			missing			decreased thickness not the same as narrowing
achene	achene		size	2 mm. long	in female florets	ca.			sort of	fruit length	FLOPO:0001366
achene	achene		size	1.5 mm. long	in bisexual florets	ca.			sort of	fruit length	FLOPO:0001366
achene	achene	rib	count	4				Present	missing			synonym of ribbed somewhere?
pappus	pappus		coloration	white		grayish				pappus white	FLOPO:0001125	pappus grey better?
pappus	pappus		pubescence	chaffy					missing			no chaffy
pappus	pappus	bristle	count	4 or 5				Present	missing			no bristles?
